# Supplementary material for: Effect of Earlier Door-to-CT and Door-to-Bleeding Control in Severe Blunt Trauma: A Retrospective Cohort Study
Source: PubMed Central journal article supplement (PMC8038745; doi:10.3390/jcm10071522), 2021-04-06
Supplement: jcm-10-01522-s001.pdf [file jcm-10-01522-s001.pdf]

## Supplementary Materials

**Table S1.** Adjusted variables used for the assessment of D2CT and D2BC in the Cox proportional hazards regression model.

| Variables                  | D2CT | D2BC |
|----------------------------|------|------|
| Patient characteristics    |      |      |
| Age                        | ✓    | ✓    |
| Sex; Female/Male           | ✓    | ✓    |
| Mechanism of injury        |      |      |
| Motor vehicle accident     | ✓    | ✓    |
| Fall from a height         | ✓    | ✓    |
| Others                     | ✓    | ✓    |
| Injury Severity Score      | ✓    | ✓    |
| Revised Trauma Score       | ✓    | ✓    |
| Deadly coagulopathy        | ✓    | ✓    |
| Deadly acidosis            | ✓    | ✓    |
| Deadly hyperthermia        | ✓    | ✓    |
| Bleeding control procedure | ✓    |      |
| Lactate                    | ✓    | ✓    |
| SOFA score                 | ✓    | ✓    |
| Heart rate                 | ✓    | ✓    |
| Body temperature           | ✓    | ✓    |
| pH                         | ✓    | ✓    |
| Hb                         | ✓    | ✓    |
| PT-INR                     | ✓    | ✓    |

D2CT, door-to-CT time; CT, computed tomography; D2BC, door-to-bleeding control; SOFA, Sequential Organ Failure Assessment; pH, potential of hydrogen; Hb, hemoglobin; PT-INR, prothrombin time-international normalized ratio.
